# Supplementary material for: MR imaging tracking of inflammation-activatable engineered neutrophils for targeted therapy of surgically treated glioma
Source: PubMed Central journal article supplement (PMC6235838; doi:10.1038/s41467-018-07250-6), 2018-11-14
Supplement: 41467_2018_7250_MOESM1_ESM.pdf [file 41467_2018_7250_MOESM1_ESM.pdf]

## **Supporting information**

MR imaging tracking of inflammation-activatable engineered neutrophils  
for targeted therapy of surgically treated glioma

Wu et al.

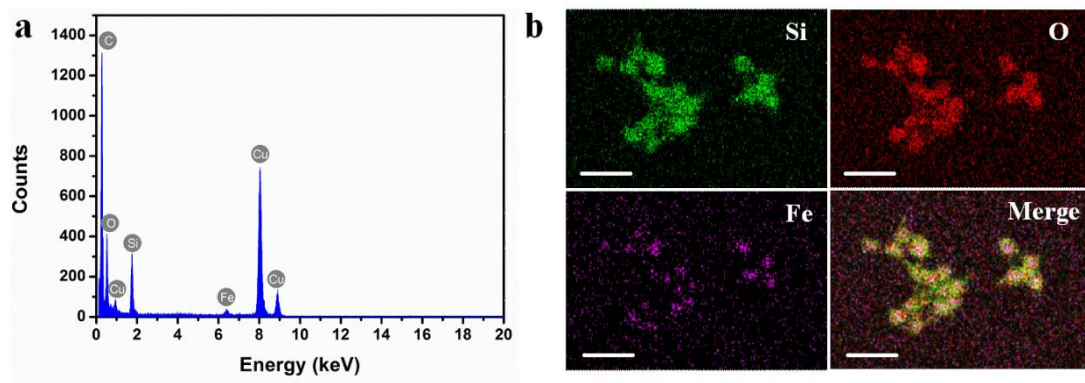

**Supplementary Figure 1.** (a) Energy dispersive X-ray spectrum of MMSNs. (b) Element mapping of Si, O, Fe elements in the MMSNs. Scale bar: 100 nm.

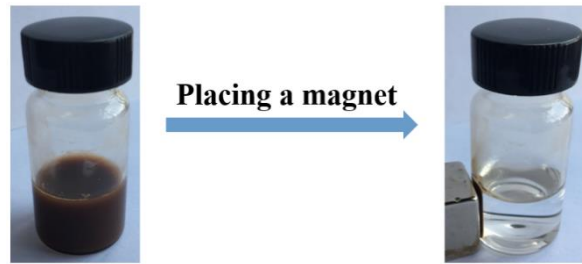

**Supplementary Figure 2.** Photographs of MMSNs well-dispersed in aqueous solution (left) and the collection of MMSNs from aqueous solution with a magnet (right).

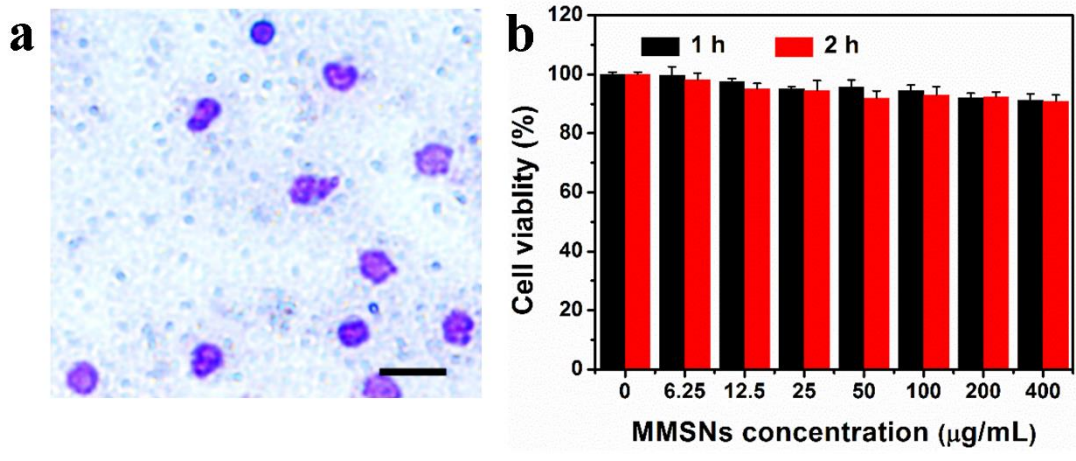

**Supplementary Figure 3.** (a) Optical microscope image of isolated neutrophils stained with Wright-Giemsa. Scale bar: 20 μm. (b) Cell viabilities of neutrophils incubated with MMSNs at different concentrations in 1 and 2 h.

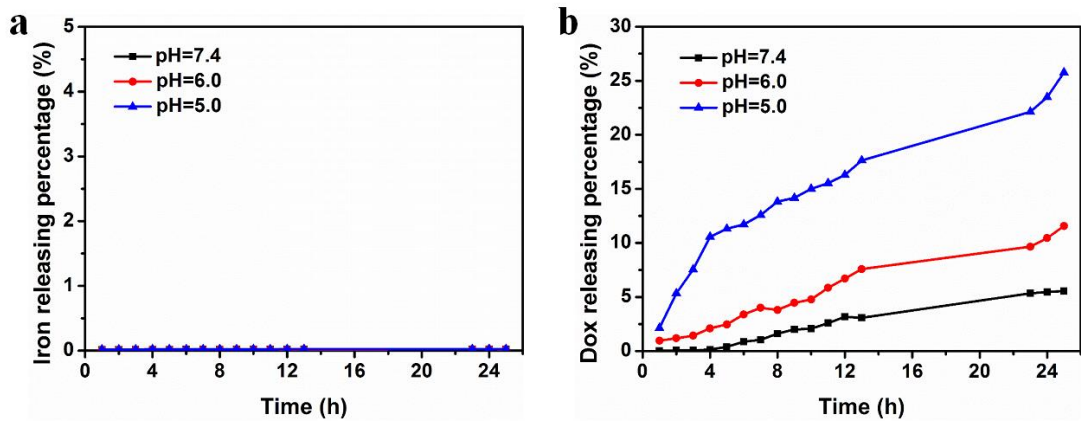

**Supplementary Figure 4.** (a) Iron releasing percentage and (b) Dox releasing percentage of D-MMSNs under different pH buffer solutions (pH = 7.4, 6.0 or 5.0).

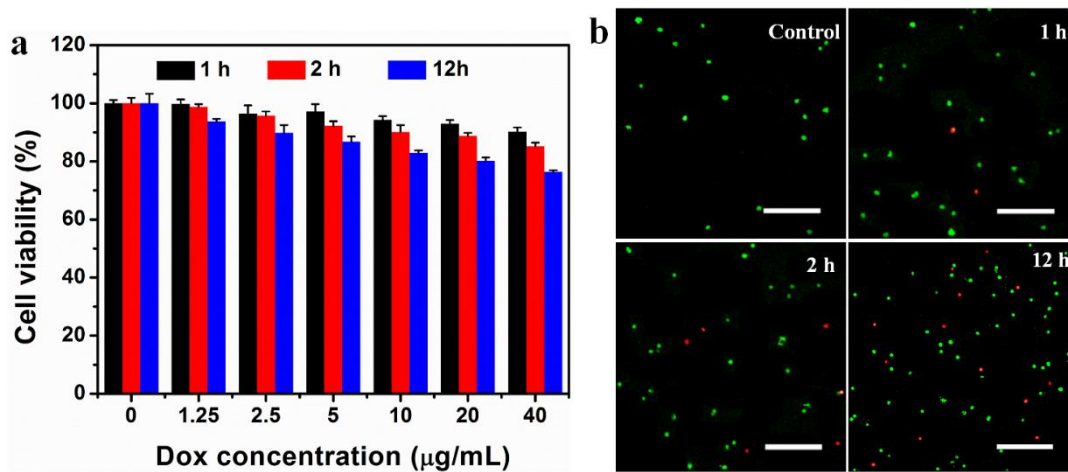

**Supplementary Figure 5.** (a) Cell viabilities of neutrophils incubated with D-MMSNs at varied Dox concentrations in 1, 2 and 12 h. (b) Fluorescence microscopy images of neutrophils treated with D-MMSNs for 0, 1, 2 and 12 h, respectively ( $[\text{Dox}] = 10 \mu\text{g mL}^{-1}$ ). Live and dead cells were stained by Calcein AM and PI, and presented in green and red colors in those images, respectively. Scale bar: 100  $\mu\text{m}$ .

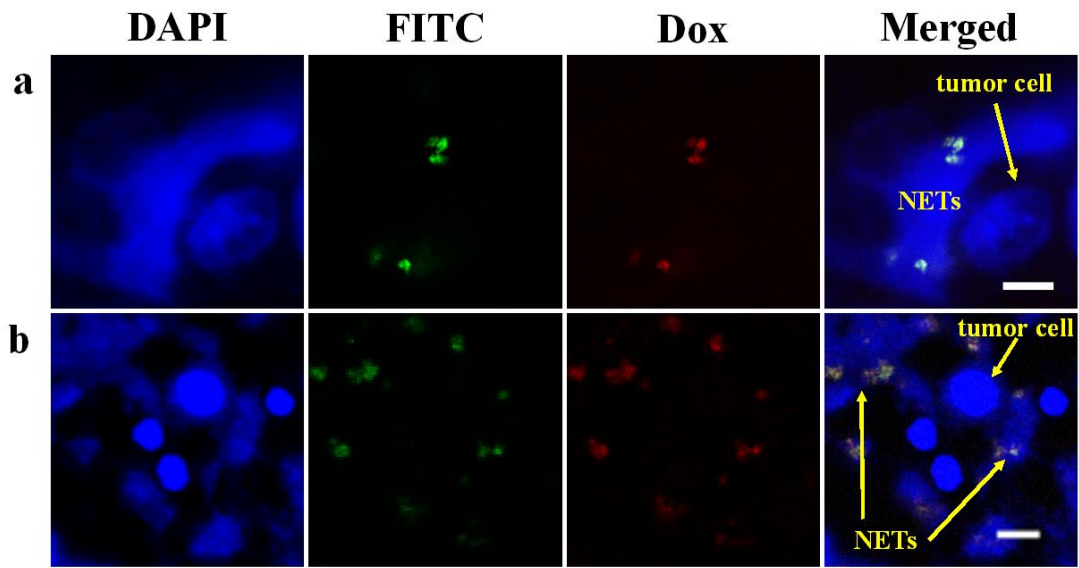

**Supplementary Figure 6.** CLSM images of (a) U87 or (b) C6 glioma cells incubated with ND-FMMSNs for 2 h under high and low magnification. Glioma cell nuclei and neutrophil-derived DNA networks were stained with DAPI emitting blue fluorescence. Green fluorescence: FITC-labeled MMSNs. Red fluorescence: Dox. (a) Scale bar: 5  $\mu\text{m}$ . (b) Scale bar: 10  $\mu\text{m}$ .

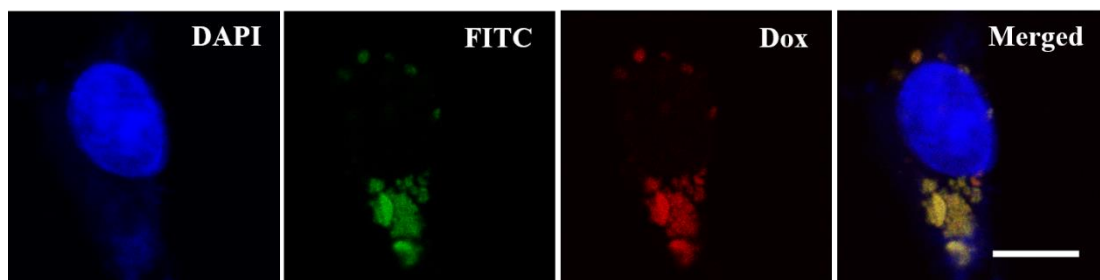

**Supplementary Figure 7.** CLSM images of C6 glioma cells after incubation with ND-FMMSNs for 4 h ( $[Dox] = 10 \mu\text{g ml}^{-1}$ ). After incubation, C6 cell nuclei were stained with DAPI emitting blue fluorescence. Green fluorescence: FITC-labeled MMSNs. Red fluorescence: Dox. Scale bar: 10  $\mu\text{m}$ .



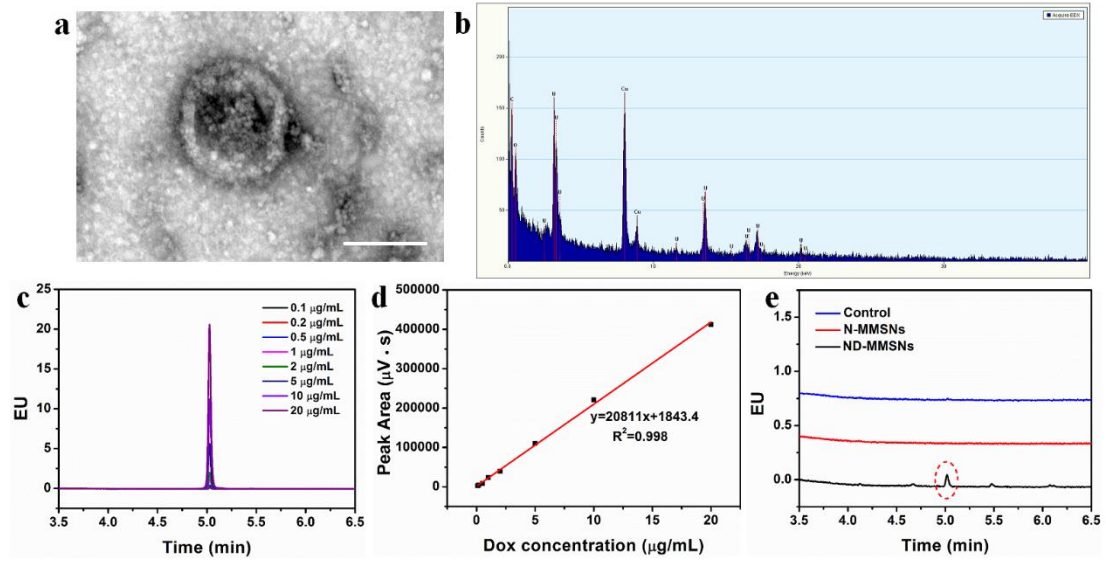

**Supplementary Figure 8.** (a) TEM image and (b) energy dispersive X-ray spectrum of ND-MMSN-derived exosomes by employing density gradient centrifugation. Scale bar: 200 nm. (c) HPLC chromatograms of different Dox concentration solutions. (d) The linear relationship between peak area and Dox concentration. (e) HPLC chromatograms of neutrophil derived exosomes, N-MMSN-derived exosomes and ND-MMSN-derived exosomes.

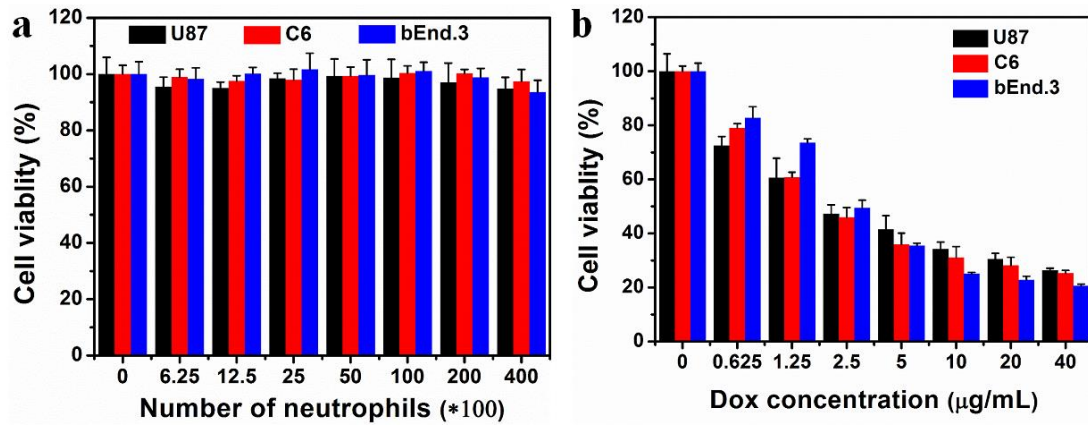

**Supplementary Figure 9.** Cell viabilities of U87, C6 or bEnd.3 cells incubated with (a) neutrophils of different numbers or (b) ND-MMSNs at varied Dox concentrations in 24 h.

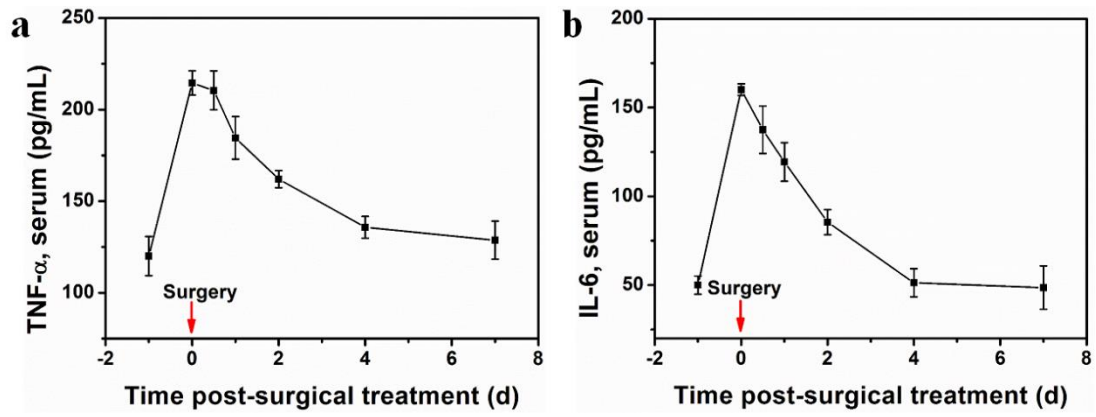

**Supplementary Figure 10.** Determination of the inflammation cytokines TNF- $\alpha$  (a) and IL-6 (b) levels in the serum of the U87-bearing mice after surgical treatment for 7 d. Mean values and error bars are defined as mean and s.d., respectively (n = 3).

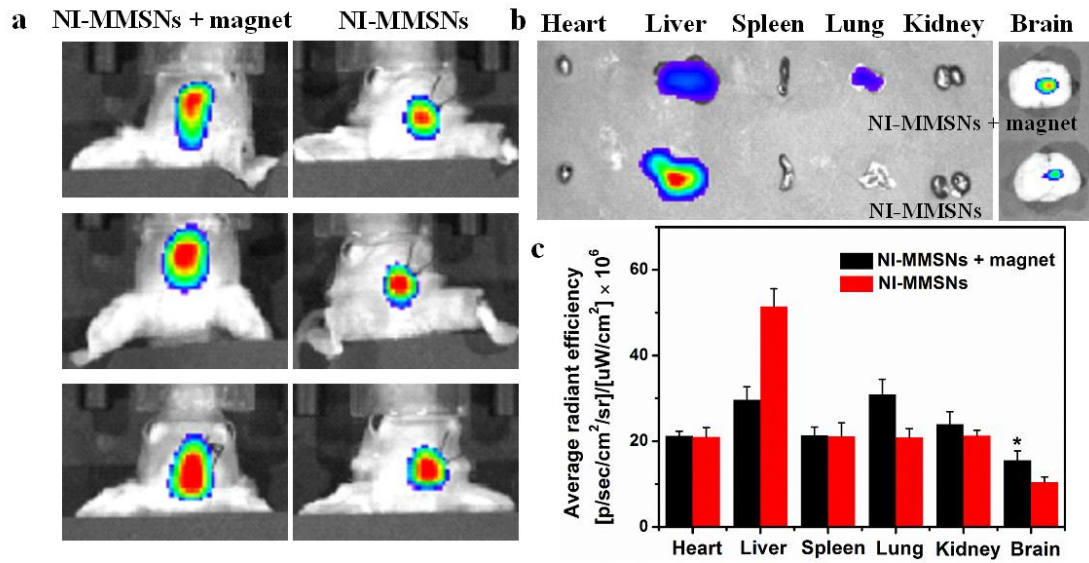

**Supplementary Figure 11.** (a) In vivo fluorescence images of postsurgical glioma-bearing nude mice after intravenous injection of NI-MMSNs with or without magnetic field. (b) Ex vivo fluorescence images of major organs and brain harvested at 4 h of postinjection. (c) The average fluorescence signal intensities in different groups. Mean values and error bars are defined as mean and s.d., respectively (n = 3). Student's two-sided *t* test. \**P* < 0.05.

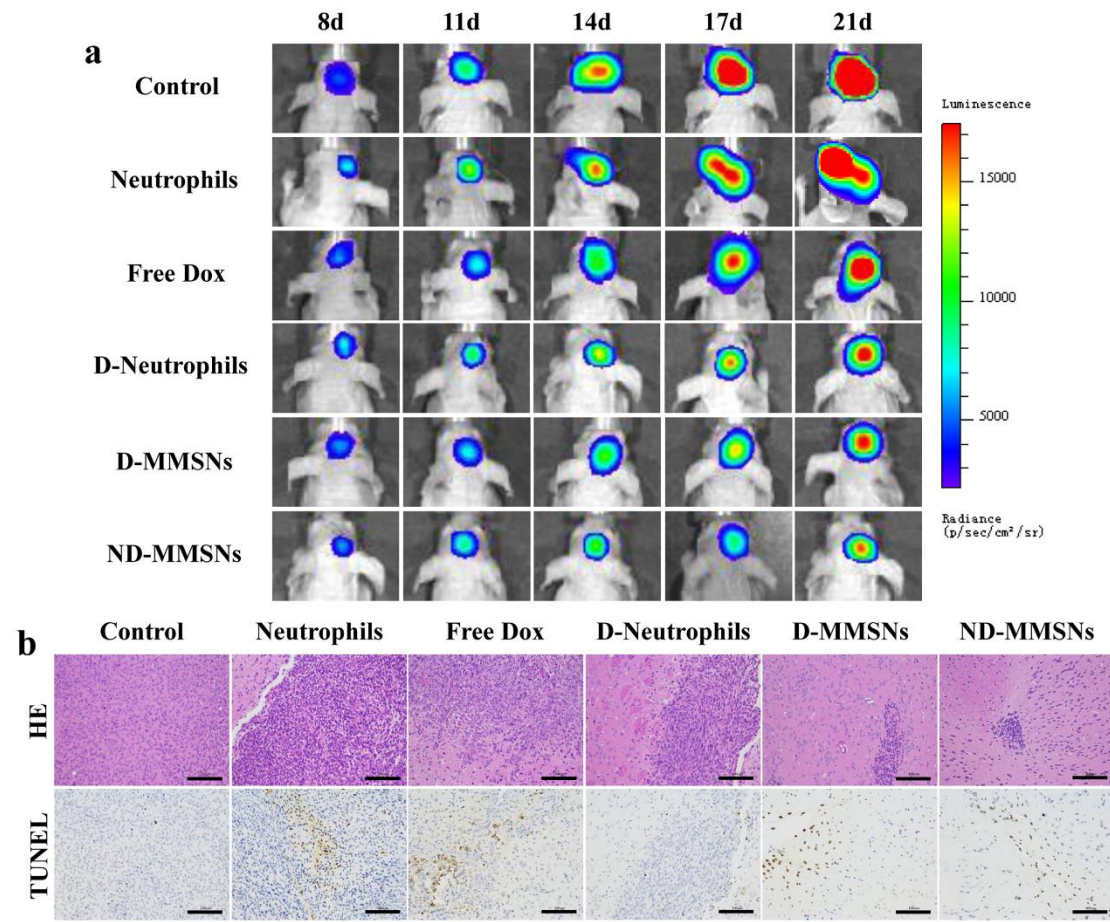

**Supplementary Figure 12.** (a) In vivo bioluminescent images of C6 glioma-bearing mice from each group after various treatment indicated. (b) Histopathology images of H&E-stained and TUNEL-stained tumor slices collected from mice 2 d after various treatments. Scale bar: 100  $\mu$ m.

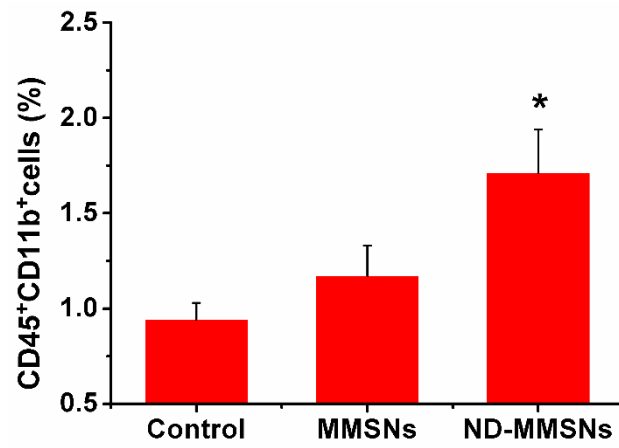

**Supplementary Figure 13.** The percentage of CD45<sup>+</sup>CD11b<sup>+</sup> cells in all of the cells. Mean values and error bars are defined as mean and s.d., respectively (n = 3). Student's two-sided *t* test. \**P* < 0.05.

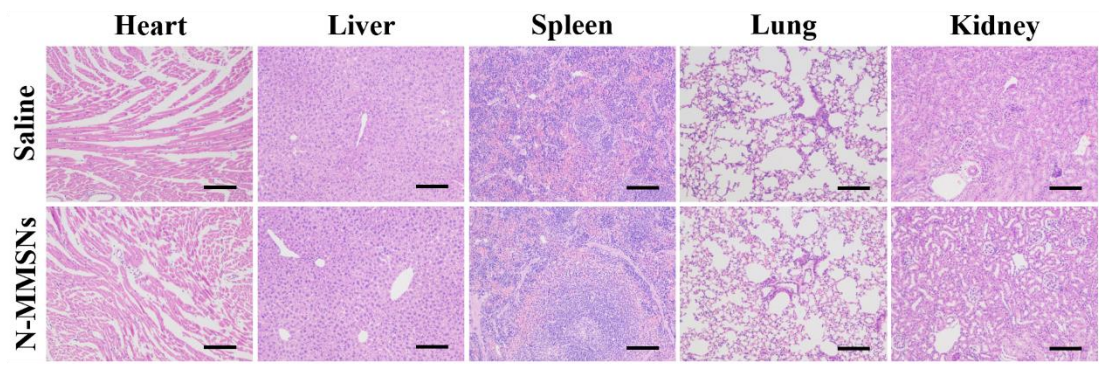

**Supplementary Figure 14.** Histological examinations of the major organs (heart, liver, spleen, lung and kidney) from mice after treatment with saline and N-MMSNs. Scale bar: 100  $\mu\text{m}$ .

**Supplementary Table 1.** The cell ratio and apoptotic cell ratio in CD45<sup>+</sup>CD11b<sup>+</sup> myeloid cells.

| Group    | Myeloid cells | Cell ratio (%) | Apoptotic ratio (%) |
|----------|---------------|----------------|---------------------|
| Control  | Neutrophils   | 1.68 ± 0.62    | 2.82 ± 0.86         |
|          | Macrophages   | 38.95±2.78     | 2.06 ±0.38          |
|          | Macrocytes    | 3.54 ± 0.35    | 4.51 ± 0.28         |
|          | Microglia     | 55.82 ±2.16    | 4.19 ±0.96          |
| MMSNs    | Neutrophils   | 5.09 ± 0.84*   | 3.72 ± 1.34         |
|          | Macrophages   | 34.10 ±1.42    | 3.40 ± 0.63         |
|          | Macrocytes    | 2.21 ± 0.85    | 4.02 ± 0.84         |
|          | Microglia     | 58.60 ±2.47    | 2.30 ± 0.46         |
| ND-MMSNs | Neutrophils   | 12.78 ± 1.42** | 7.57 ± 1.32*        |
|          | Macrophages   | 30.06 ±2.36*   | 6.71 ± 1.37*        |
|          | Macrocytes    | 2.94 ± 0.58    | 3.50 ± 0.71         |
|          | Microglia     | 54.22 ±2.86    | 3.18 ± 0.82         |

Note: The total population of CD45<sup>+</sup>CD11b<sup>+</sup> cells is considered to be 100 %. Mean values and error bars are defined as mean and s.d., respectively (n = 3). Student's two-sided *t* test. \**P* < 0.05 and \*\**P* < 0.01.
